# Supplementary material for: Novel Structurally Related Flavones Augment Cell Death Induced by rhsTRAIL
Source: MDPI journal article supplement (doi:10.3390/ijms18061211), 2017-06-06
Supplement: s1 [file s1]

## Supplementary figures:

**Figure 1.** Cytotoxic effect of flavones on SW480 and SW620 colon cancer cells. Cells were incubated with compounds at the concentrations of 50  $\mu\text{M}$  and 100  $\mu\text{M}$  for 48 h. The values represent the mean $\pm$ SD of three independent experiments ( $n = 3$ ). The percentage of cell death was measured using the MTT cytotoxicity assay (\*\* $^*$  =  $P < 0.001$  compared to control without flavone,  $^{\#}$  =  $P < 0.05$ ,  $^{\#\#}$  =  $P < 0.01$  and  $^{\#\#\#}$  =  $P < 0.001$  compared to substrate – 5-HF or 6-HF or 7-HF). Cytotoxic activity of (A) 5-HF, 5-AF and 5-BF, (B) 6-HF, 6-AF and 6-BF, (C) 7-HF, 7-AF and 7-BF against colon cancer cells.

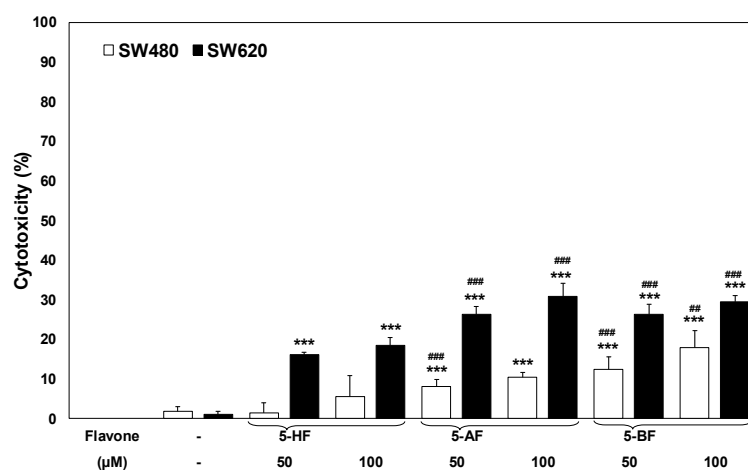

(A)

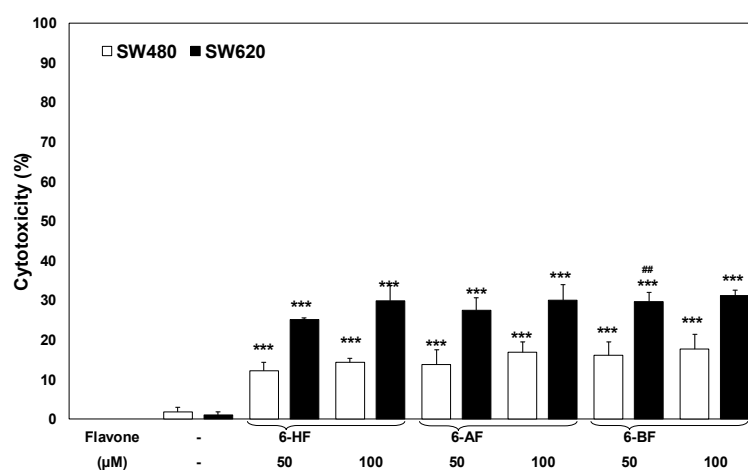

(B)

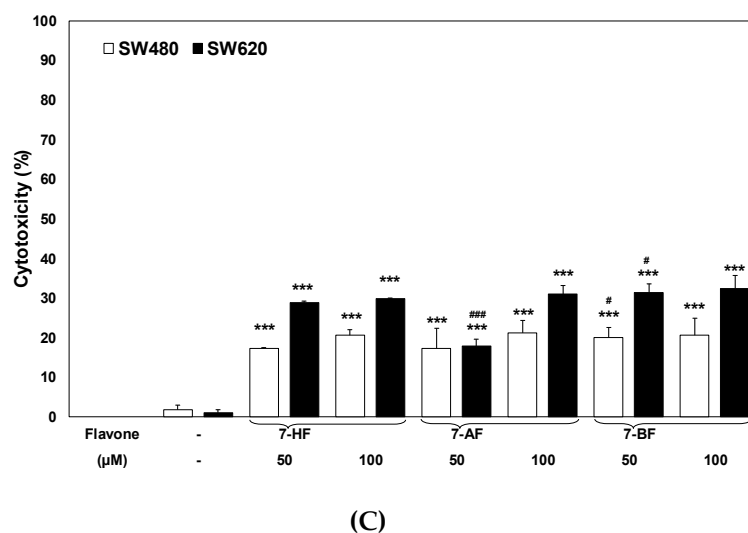

(C)

**Figure 2.** Apoptotic effect of flavones on SW480 and SW620 colon cancer cells. Cells were incubated with compounds at the concentrations of 50  $\mu$ M and 100  $\mu$ M for 48 h. The values represent the mean $\pm$ SD of three independent experiments (n = 3). Apoptotic cell death was detected by flow cytometry using annexin V-FITC staining (\* =  $P < 0.05$  and \*\*\* =  $P < 0.001$  compared to control without flavone, # =  $P < 0.05$ , ## =  $P < 0.01$  and ### =  $P < 0.001$  compared to substrate – 5-HF or 6-HF or 7-HF). Apoptotic activity of (A) 5-HF, 5-AF and 5-BF, (B) 6-HF, 6-AF and 6-BF, (C) 7-HF, 7-AF and 7-BF against colon cancer cells.

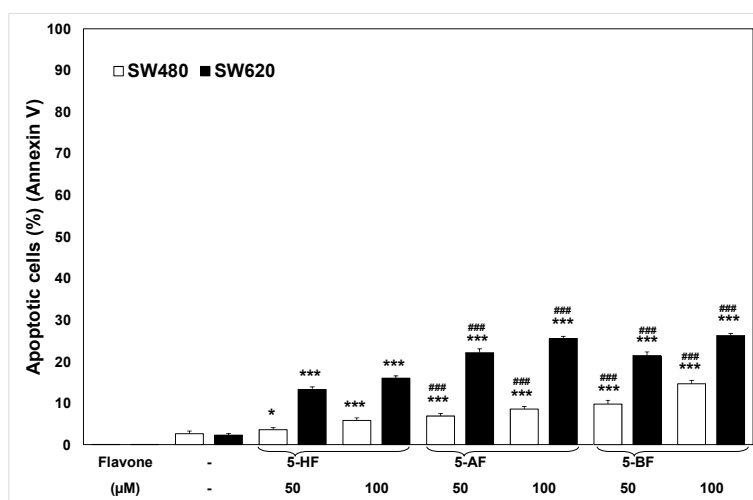

(A)

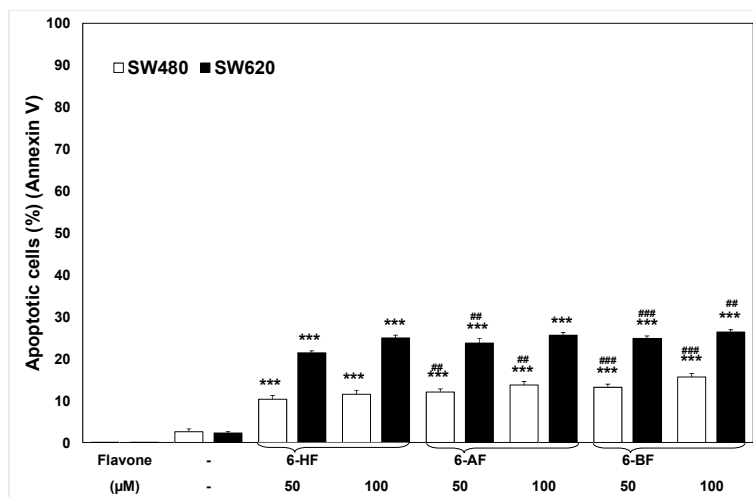

(B)

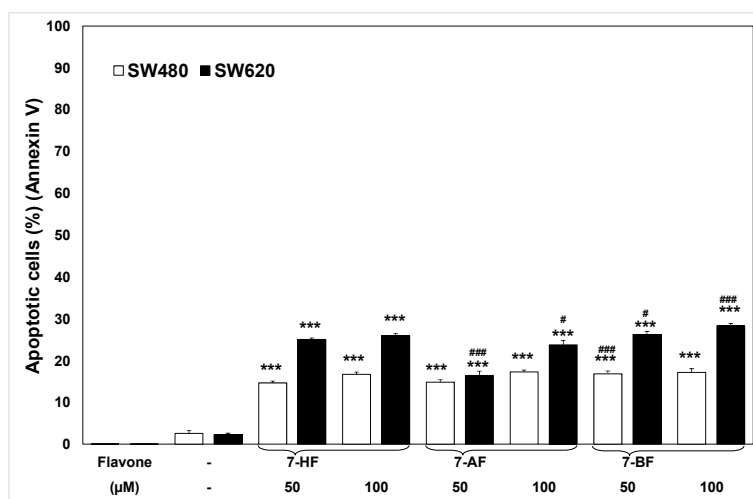

(C)
